# Supplementary material
Source: HighWire-hosted journal article supplement (https://bmjopengastro.bmj.com/highwire/filestream/2188/field_highwire_adjunct_files/0/bmjgast-2020-000574supp001_data_supplement.pdf)
Supplement: bmjgast-2020-000574supp001_data_supplement.pdf [file bmjgast-2020-000574supp001_data_supplement.pdf]

**Supplemental Table 1.** Data from adolescent girls with polycystic ovary syndrome (PCOS) who were randomized to receive ethinylestradiol-levonorgestrel (N=31) or low-dose spironolactone-pioglitazone-metformin (N=31) for 12 months.

|                                 | All PCOS (N=62) | Ethinylestradiol-Levonorgestrel (N=31) |                         |           | SPIOMET (N=31)     |                         |                         |
|---------------------------------|-----------------|----------------------------------------|-------------------------|-----------|--------------------|-------------------------|-------------------------|
|                                 |                 | Start <sup>a</sup>                     | 12 mo                   | Δ 0-12 mo | Start <sup>a</sup> | 12 mo                   | Δ 0-12 mo               |
| Age (yr)                        | 15.8 ± 0.2      | 15.9 ± 0.2                             | --                      | --        | 15.7 ± 0.2         | --                      | --                      |
| BMI (kg/m <sup>2</sup> )        | 24.2 ± 0.5      | 24.2 ± 0.7                             | 24.9 ± 0.8 <sup>c</sup> | 0.7 ± 0.3 | 24.2 ± 0.7         | 23.9 ± 0.7              | -0.2 ± 0.3 <sup>e</sup> |
| BMI Z-score                     | 0.8 ± 0.1       | 0.9 ± 0.2                              | 1.1 ± 0.2 <sup>b</sup>  | 0.2 ± 0.1 | 0.8 ± 0.2          | 0.7 ± 0.2               | -0.1 ± 0.1 <sup>e</sup> |
| Hirsutism score                 | 0.2 ± 0.1       | 17 ± 1                                 | 14 ± 1 <sup>d</sup>     | -3 ± 1    | 16 ± 1             | 11 ± 1 <sup>d</sup>     | -5 ± 1 <sup>g</sup>     |
| SHBG (nmol/L)                   | 30 ± 2          | 31 ± 2                                 | 61 ± 5 <sup>d</sup>     | 30 ± 4    | 30 ± 2             | 32 ± 2                  | 2 ± 2 <sup>g</sup>      |
| Testosterone (ng/dL)            | 41 ± 4          | 38 ± 4                                 | 21 ± 2 <sup>d</sup>     | -17 ± 4   | 43 ± 7             | 23 ± 2 <sup>c</sup>     | -20 ± 7                 |
| Androstenedione (ng/dL)         | 151 ± 8         | 137 ± 9                                | 73 ± 6 <sup>d</sup>     | -64 ± 10  | 164 ± 11           | 100 ± 9 <sup>d</sup>    | -64 ± 11                |
| Fasting Insulin (μU/mL)         | 11 ± 1          | 12 ± 1                                 | 15 ± 1 <sup>b</sup>     | 3 ± 1     | 10 ± 1             | 6 ± 1 <sup>d</sup>      | -4 ± 1 <sup>g</sup>     |
| HOMA-IR                         | 2.3 ± 0.2       | 2.6 ± 0.3                              | 3.0 ± 0.3               | 0.4 ± 0.2 | 2.1 ± 0.2          | 1.2 ± 0.1 <sup>d</sup>  | -0.9 ± 0.3 <sup>f</sup> |
| Triacylglycerol (mg/dL)         | 60 ± 3          | 58 ± 3                                 | 66 ± 4 <sup>b</sup>     | 8 ± 3     | 62 ± 4             | 59 ± 4                  | -3 ± 4 <sup>e</sup>     |
| LDL-cholesterol (mg/dL)         | 89 ± 3          | 90 ± 3                                 | 105 ± 5 <sup>d</sup>    | 15 ± 4    | 87 ± 4             | 87 ± 4                  | 0 ± 2 <sup>f</sup>      |
| HDL-cholesterol (mg/dL)         | 51 ± 1          | 51 ± 2                                 | 51 ± 2                  | 0 ± 1     | 50 ± 2             | 55 ± 2 <sup>c</sup>     | 5 ± 2 <sup>e</sup>      |
| HMW-adiponectin (mg/L)          | 6.8 ± 0.6       | 6.5 ± 0.6                              | 8.9 ± 1.3 <sup>b</sup>  | 2.6 ± 1.1 | 7.1 ± 0.9          | 17.1 ± 2.6 <sup>d</sup> | 10.0 ± 2.1 <sup>f</sup> |
| C-Reactive Protein (mg/L)       | 1.5 ± 0.2       | 1.2 ± 0.2                              | 2.6 ± 0.4 <sup>c</sup>  | 1.4 ± 0.4 | 1.8 ± 0.4          | 0.7 ± 0.1 <sup>c</sup>  | -1.1 ± 0.4 <sup>g</sup> |
| <b>Abd MRI</b>                  |                 |                                        |                         |           |                    |                         |                         |
| Subc Fat (cm <sup>2</sup> )     | 174 ± 14        | 169 ± 18                               | 184 ± 19                | 15 ± 9    | 179 ± 21           | 171 ± 19                | -8 ± 11                 |
| Visceral Fat (cm <sup>2</sup> ) | 43 ± 2          | 41 ± 3                                 | 45 ± 4                  | 4 ± 3     | 44 ± 3             | 35 ± 2 <sup>b</sup>     | -9 ± 4 <sup>f</sup>     |
| Liver Fat (%)                   | 17 ± 1          | 17 ± 1                                 | 19 ± 1                  | 2 ± 1     | 18 ± 1             | 10 ± 1 <sup>d</sup>     | -8 ± 1 <sup>g</sup>     |

Values are mean ± SEM. BMI, body mass index; SHBG, sex hormone-binding globulin; HOMA-IR, homeostasis model assessment-insulin resistance; HMW adiponectin, high-molecular-weight adiponectin; Abd MRI, abdominal magnetic resonance imaging

<sup>a</sup> no significant differences between randomized subgroups at start

<sup>b</sup> p < 0.05, <sup>c</sup> p < 0.01 and <sup>d</sup> p < 0.001 within subgroups for 0-12 mo change (Δ)

<sup>e</sup> p < 0.05, <sup>f</sup> p < 0.01, <sup>g</sup> p < 0.001 between subgroups for 0-12 mo change (Δ)

The contents of this Table are derived from Ref. 6
